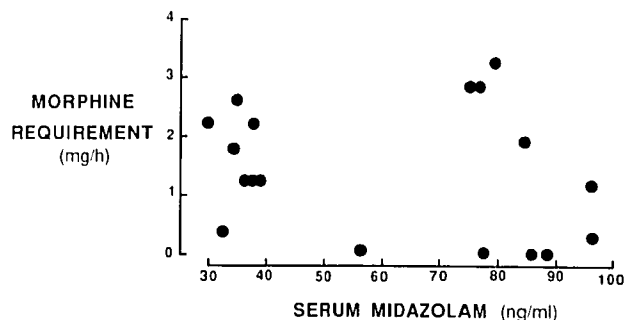

FIG. 3. The relationship between the averaged ("steady-state") midazolam level (ng/ml) and the morphine sulfate requirement for individual patients during the first 8 h after cardiac surgery are shown ( $r^2 = 0.05$ ).

to be offset by the other beneficial effects of the drug (e.g., anxiolysis, sedation, amnesia).

#### REFERENCES

1. Dobb GJ, Murphy DF: Sedation and analgesia during intensive care. *Clinics in Anaesthesiology* 3:1055-1085, 1985
2. Korttila K, Aromaa U: Venous complications after intravenous injection of diazepam, flunitrazepam, thiopentone and etomidate. *Acta Anaesthesiol Scand* 24:227-230, 1980
3. Greenblatt DJ, Allen MD, Harmatz JS, Shader RI: Diazepam disposition determinants. *Clin Pharmacol Ther* 27:301-312, 1980
4. Greenblatt DJ: Simultaneous gas chromatographic analysis for diazepam and its major metabolite, desmethyldiazepam, with use of double internal standardization. *Clin Chem* 24:1838-1841, 1978
5. Greenblatt DJ, Locniskar A, Ochs HR, Lauen PM: Automated gas chromatography for studies of midazolam pharmacokinetics. *ANESTHESIOLOGY* 55:176-179, 1981
6. Merriman HM: The techniques used to sedate ventilated patients. *Intensive Care Med* 7:217-224, 1981
7. Shapiro JM, Westphal LM, White PF, Sladen RN, Rosenthal MH: Midazolam infusion for sedation in the intensive care unit: Effect on adrenal function. *ANESTHESIOLOGY* 64:394-398, 1986
8. Edbrooke DL, Newby DM, Mather SJ, Dixon AM, Hebron BS: Safer sedation for ventilated patients—A new application for etomidate. *Anaesthesia* 37:765-771, 1982
9. Shafer A, White PF, Schüttler J, Rosenthal MH: Use of a fentanyl infusion in the intensive care unit: Tolerance to its anesthetic effects? *ANESTHESIOLOGY* 59:245-248, 1983
10. Allonen H, Ziegler G, Klotz U: Midazolam kinetics. *Clin Pharmacol Ther* 30:653-661, 1981
11. Fragen RJ, Tobin M: Does midazolam augment morphine analgesia for postoperative pain? *ANESTHESIOLOGY* 61:A192, 1984
12. Forster A, Gardez JP, Suter PM, Gemperle M: I.V. midazolam as an induction agent for anesthesia: A study in volunteers. *Br J Anaesth* 52:907-911, 1980
13. Fragen RJ, Meyers SN, Barresi V, Caldwell NJ: Hemodynamic effects of midazolam in cardiac patients. *ANESTHESIOLOGY* 51:S103, 1979
14. Lowry KG, Dundee JW, McClean E, Lyons SM, Carson IW, Orr IA: Pharmacokinetics of diazepam and midazolam when used for sedation following cardiopulmonary bypass. *Br J Anaesth* 57:883-885, 1985
15. Byatt CM, Lewis LD, Dawling S, Cochrane GM: Accumulation of midazolam after repeated dosage in patients receiving mechanical ventilation in an intensive care unit. *Br J Med* 289:799-800, 1984
16. Harper KW, Collier PS, Dundee JW, Elliott P, Halliday NJ, Lowry KG: Age and nature of operation influence the pharmacokinetics of midazolam. *Br J Anaesth* 57:866-871, 1985

Anesthesiology  
67:262-264, 1987

## Regional Anesthesia in a Child with Epidermolysis Bullosa

RONALD KAPLAN, M.D.,\* BERISH STRAUCH, M.D.†

Epidermolysis bullosa (EB) is an hereditary disorder with dominant and recessive modes of genetic transmission.<sup>1</sup> It is characterized by bullous formation in strati-

fied squamous epithelium that can result in blistering, fusion, and scarring of the lips, oropharyngeal structures, and esophagus. The oropharyngeal involvement may make airway manipulation hazardous during general anesthesia. The use of regional anesthesia in a patient with EB, undergoing correction of syndactyly, is described.

\* Associate Professor of Anesthesiology, Albert Einstein College of Medicine; and Assistant Attending Anesthesiologist, Montefiore Medical Center.

† Professor of Surgery, Albert Einstein College of Medicine; and Chief, Division of Plastic Surgery, Albert Einstein College of Medicine and Montefiore Medical Center.

Received from the Albert Einstein College of Medicine, Bronx, New York; and the Montefiore Medical Center, Bronx, New York. Accepted for publication March 10, 1987.

Address reprint requests to Dr. Kaplan: Department of Anesthesiology, Montefiore Medical Center, 210 East 210th Street, Bronx, New York 10467.

Key words: Anesthetic techniques. Epidermolysis bullosa. Regional. Skin.

## CASE REPORT

A 4-yr-old, 89-cm girl, weighing 10 kg, with autosomal recessive type EB, was scheduled for release of flexion contractures and co-cooning of the left hand, by skin grafting and local skin flaps. In addition to skin manifestations, she had recurrent oral bullae and brief periods of dysphagia. A trial of phenytoin failed to improve her condition. She was followed medically on a regular basis, and had a very stable and supportive family. Examination revealed cutaneous and intra-oral blistering and scarring, in various stages of formation and resolution. Her hand deformities were bilateral.

The child received no premedication the morning of surgery. Anesthesia was induced with 250 mg of thiopental rectally. As the thiopental effect dissipated, 40 mg of ketamine was given *im*, and another 40 mg was administered *im* 10 min later, to facilitate securing an intravenous line and monitoring devices. The latter consisted of a precordial stethoscope and an automatic blood pressure measuring unit. Xeroform® and Webril® were used to wrap the arm for both blood pressure and tourniquet cuffs. The stethoscope rested on Xeroform®, with a hole cut to the size of the stethoscope aperture. A skin temperature probe was placed in the right axilla. Oxygen was insufflated at 5 l/min over the mouth and nose.

Another 30 mg of ketamine *iv* was given to facilitate performing a left brachial plexus block, using an axillary approach. The axilla was blotted with a povidine iodine solution, with care taken not to rub or abrade the skin. A nerve stimulator capable of 2 Hz and a current output of 0.5–1.5 ma was used to localize the plexus. The ground electrode was connected to a saline-soaked sponge placed under the patient's back, and the other electrode to an all metal 25-gauge 4-cm needle. The needle was placed as high in the axilla as possible, and directed toward the axillary artery. The needle direction was adjusted until maximal wrist flexions occurred at the lowest current possible. At this point, following negative aspiration for blood, 8 ml of 0.25% bupivacaine was injected, with complete cessation of hand movement.

During the first hour, surgery on the hand caused no alteration in heart rate, arterial blood pressure, ventilation, or movement by the patient to indicate inadequate anesthesia. Prior to harvesting of skin from the left thigh, 20 mg of ketamine and 7.5 µg of fentanyl were administered *iv*. Nevertheless, the patient moved and grimaced, and the blood pressure, heart rate, and respiratory rate increased as the incision continued. An additional 20 µg of fentanyl *iv* was given for harvesting of the skin.

Twelve hours passed before the patient complained of pain in the hand. The mother reported that the patient recalled awakening with pain during the procedure. Although the child could not tell the parent the location of the "hurt," it was presumed to have been in the leg at the time of the skin graft harvesting. In addition, the child told the mother of feeling herself being moved. We were unable to determine if this was related to intraoperative or recovery room events.

Eight months later, the patient returned for a similar procedure on the right hand. She now weighed 11.5 kg. The anesthetic was managed similarly to that used for the left hand procedure, except that, in addition to a right axillary block, 2.5 mg of diazepam was administered *iv* to reduce recall and 2.0 ml of 0.25% bupivacaine was injected as the needle was advanced toward the right anterior iliac spine from an insertion just inferior and medial to this structure. This was performed to block the right lateral femoral cutaneous nerve. There was no abrupt change in the patient's vital signs or activity to indicate inadequate anesthesia during the surgical manipulations. Following administration of the regional blocks until the end of each surgery, the patient received average hourly doses of 1 mg/kg of ketamine and 1.3 µg/kg of fentanyl during the first procedure (3 h of surgery), and 1.5 mg/kg of ketamine and 1.3 µg/kg of fentanyl during the second procedure (3.5 h of surgery).

## DISCUSSION

Intraoperative anesthetic problems in the patient with EB relate primarily to bullae formation from trauma to squamous epithelium. This includes cutaneous, oral, pharyngeal, laryngeal, and esophageal surfaces. There is particular concern about lesions developing from face masks, oral airways, laryngoscopes, and endotracheal tubes. Although the incidence of severe reactions is low when appropriate precautions are observed,<sup>2,3</sup> ketamine and/or insufflation of inhaled volatile anesthetics have been the methods recommended, in order to minimize risks to the airway during surgery.<sup>4-6</sup>

Although regional anesthesia has been suggested,<sup>7</sup> its use has not been described for EB, either as supplements to or as the main anesthetic. Reports that have addressed regional techniques have discouraged its use out of concern about physical and chemical trauma to skin, because contractures may make the technique difficult, the planned surgery was too extensive, and infected skin lesions were present or might occur at the site of needle placement.<sup>3,7-11</sup> There may also be concern about performing regional anesthesia in pediatric patients because of the uncooperative nature of children when manipulated for regional techniques, the inability to be certain about needle placement near neural structures, and lack of knowledge and experience with regional techniques and local anesthetic doses in children. These problems can be readily addressed,<sup>12,13</sup> and there is no reason why regional techniques cannot be considered and used for procedures such as the one described in this report.

Regardless of the anesthetic chosen, the anesthetist may be required to support the airway, because of respiratory obstruction or depression from any of the agents used. A soft, padded dressing should be used to protect the face during mask placement. Oral airways, endotracheal tubes, and laryngoscope blades should be generously lubricated. The head and endotracheal tube should be secured to keep movement to a minimum. The tube can be kept in place with umbilical tape tied to it and wrapped around the head, using a soft dressing or padding between the tape and skin.

In summary, a child with EB was given two brachial plexus regional anesthetics, one of which was combined with a lateral femoral cutaneous nerve block. The authors maintain that EB should not be viewed as an absolute contraindication to regional anesthesia, but that this modality can be considered when it is judged to be an appropriate anesthetic technique for a patient with this condition.

The authors thank Drs. H. Nagashima and I. Hollinger for their valuable assistance with this patient.

## REFERENCES

1. Carter DM, O'Keefe EJ: Hereditary cutaneous disorders, *Dermatology*. Edited by Moschella SL, Hurley HJ. Philadelphia, WB Saunders Co., 1985, pp 1200-1206
2. James I, Wark H: Airway management during anesthesia in patients with epidermolysis bullosa dystrophica. *ANESTHESIOLOGY* 56:323-326, 1982
3. Reddy ARR, Wong DHW: Epidermolysis bullosa: A review of anesthetic problems and case reports. *Can Anaesth Soc J* 19:536-548, 1972
4. Marshall BE: A comment on epidermolysis bullosa and its anesthetic management for dental operations. *Br J Anaesth* 35:724-772, 1963
5. Petty WC, Gunther RC: Anesthesia for nonfacial surgery in polydysplastic epidermolysis bullosa (dystrophic). *Anesth Analg* 49:246-250, 1970
6. LoVerme SR, Oropollo AT: Ketamine anesthesia in dermatolytic bullous dermatosis (epidermolysis bullosa). *Anesth Analg* 56:398-401, 1977
7. Mark LC, Marx GF, Arkins RE, Erlanger H, Joffe S, Kepes E, Ravin MB, Steen SN: Anesthesia in epidermolysis bullosa. *Clinical Anesthesia Conference*. NY State J Med 66:511-512, 1966
8. Berryhill RE, Benumof JL, Saidman LJ, Smith PC, Plumer MH: Anesthetic management of emergency cesarean section in a patient with epidermolysis bullosa dystrophica polydysplastica. *Anesth Analg* 57:281-283, 1978
9. Kubota Y, Norton ML, Goldenberg S, Robertazzi RW: Anesthetic management of patients with epidermolysis bullosa undergoing surgery. *Anesth Analg* 40:244-249, 1961
10. Lee C, Nagel EL: Anesthetic management of a patient with recessive epidermolysis bullosa dystrophica. *ANESTHESIOLOGY* 43:122-124, 1975
11. Milne B, Rosales JK: Anaesthesia for correction of oesophageal stricture in a patient with recessive epidermolysis bullosa dystrophica: Case report. *Can Anaesth Soc J* 27:169-171, 1980
12. Singler RC: Pediatric regional anesthesia, *Pediatric Anesthesia*. Edited by Gregory GA. New York, Churchill Livingstone, 1983, pp 481-518
13. Schulte-Steinberg O: Neural blockade for pediatric surgery. *Neural Blockade in Clinical Anesthesia and Management of Pain*. Edited by Cousins MJ, Bridenbaugh PO. Philadelphia, JB Lippincott, 1980, pp 503-523

Anesthesiology  
67:264-266, 1987

## Hyperkalemia after Succinylcholine Administration in a Patient with Closed Head Injury without Paresis

DAVID D. FRANKVILLE, M.D.,\* JOHN C. DRUMMOND, M.D.†

Succinylcholine-induced hyperkalemia can occur in many clinical conditions,<sup>1-8</sup> both with and without skeletal muscle paralysis. The report by Stevenson and Birch<sup>9</sup> describing hyperkalemia following succinylcholine administration to a patient recovering from a closed head injury is unique. As pointed out by Miller and Savarese,<sup>10</sup> one should be hesitant in concluding that succinylcholine should not be administered to patients with a closed head injury on the basis of a single case report. This report presents another case of hyperkalemia associated with succinylcholine administration in a patient recovering from a closed head injury, and further justifies concern when administering succinylcholine to this group of patients.

### REPORT OF A CASE

The patient was a previously healthy, 22-yr-old man who sustained an isolated closed head injury following a motorcycle accident. The patient was admitted with an initial Glasgow coma scale of 5 (eyes-1, verbal-1, motor-3). CT-scan showed "diffuse axonal injury with numerous small punctate hemorrhages" of the frontal lobes. There was no surgically correctable lesion. At 31 days post-injury, he was not able to adequately protect his airway and underwent an uncomplicated halothane-atracurium anesthetic for placement of a tracheostomy.

A follow-up CT scan revealed hydrocephalus, and the patient was brought to the operating room 71 days post-injury for placement of a ventriculo-peritoneal shunt. Physical examination revealed a young man, 60 kg, who was unresponsive to voice but would move all extremities spontaneously and in response to pain. He demonstrated good muscle strength and no spasticity, though the Babinski reflex was positive bilaterally. Ventilation was spontaneous via the tracheostomy. He was afebrile with no evidence of infection. Medications included tube feedings, trimethoprim/sulfamethoxazole, and phenobarbital 150 mg po BID. Preoperative laboratories included a hematocrit of 40%, white blood cell count of 8,600 cells/mm<sup>3</sup>, and a potassium of 3.6 meq/l.

Operative monitoring included a precordial stethoscope, automatic arterial blood pressure cuff, pulse oximeter, temperature, and continuous electrocardiogram (modified V-5 configuration). Anesthesia was induced with sodium thiamylal (350 mg) iv, followed by hyperventilation with O<sub>2</sub>, N<sub>2</sub>O, and isoflurane. Because of the presence of copious secretions, the patient was suctioned through his tracheostomy which prompted vigorous and persistent coughing. Succinylcholine (60 mg) was administered iv without evidence of fasciculations. Approximately

\* Resident in Anesthesiology.

† Associate Clinical Professor of Anesthesiology.

Received from the Departments of Anesthesia, University of California at San Diego, San Diego, California; and the Veteran's Administration Medical Center, La Jolla, California. Accepted for publication March 12, 1987.

Address reprint requests to Dr. Drummond: University of California at San Diego, M-029, La Jolla, California 92093.

Key words: Anesthesia; neurosurgical. Ions: potassium. Neuromuscular relaxants: succinylcholine.
